# Supplementary material
Source: publisher site journal article supplement (https://www.dovepress.com/article/291945)
Supplement: Supplementary file 1 [file get_supplementary_file.php]

Supplementary material

**Low dose curcumin administered in hyaluronic acid-based nanocapsules induces hypotensive effect in hypertensive rats**

Izabela Czyzynska-Cichon1,‡, Małgorzata Janik-Hazuka2,‡, Joanna Szafraniec-Szczęsny2,3, Krzysztof Jasinski4, Władysław P. Węglarz4, Szczepan Zapotoczny2,*, Stefan Chlopicki1,5,*

1 Jagiellonian University, Jagiellonian Centre for Experimental Therapeutics (JCET), Bobrzynskiego 14, 30-384 Krakow, Poland

2 Jagiellonian University, Faculty of Chemistry, Gronostajowa 2, 30-387 Krakow, Poland

3 Jagiellonian University Medical College, Faculty of Pharmacy, Department of Pharmaceutical Technology and Biopharmaceutics, Medyczna 9, 30-688 Krakow, Poland

4 Institute of Nuclear Physics Polish Academy of Sciences, Department of Magnetic Resonance Imaging, Radzikowskiego 152, 31-342 Krakow, Poland

5 Jagiellonian University Medical College, Faculty of Medicine, Department of Pharmacology, Grzegorzecka 16, 31-531, Krakow, Poland

‡ Those authors equally contributed to the work

First authors: Izabela Czyzynska-Cichon, Małgorzata Janik-Hazuka

Correspondence:

Stefan Chlopicki - stefan.chlopicki@jcet.eu

Szczepan Zapotoczny - zapotocz@chemia.uj.edu.pl

**Methods**

**
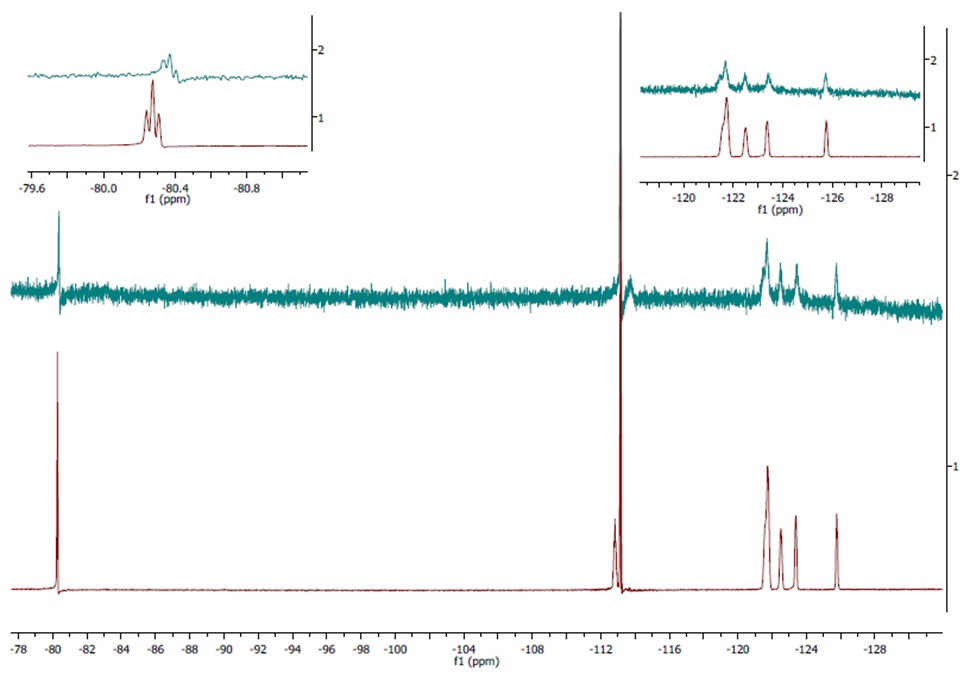
**

**Figure S1.** 19F NMR spectra of FC10 (red) in DMSO-d6 and HyFC10 (green) in a mixture of D2O and DMSO-d6 (2:1, v/v) (chemical shifts vs. monofluorobenzene, δ = -113.15 ppm).

**
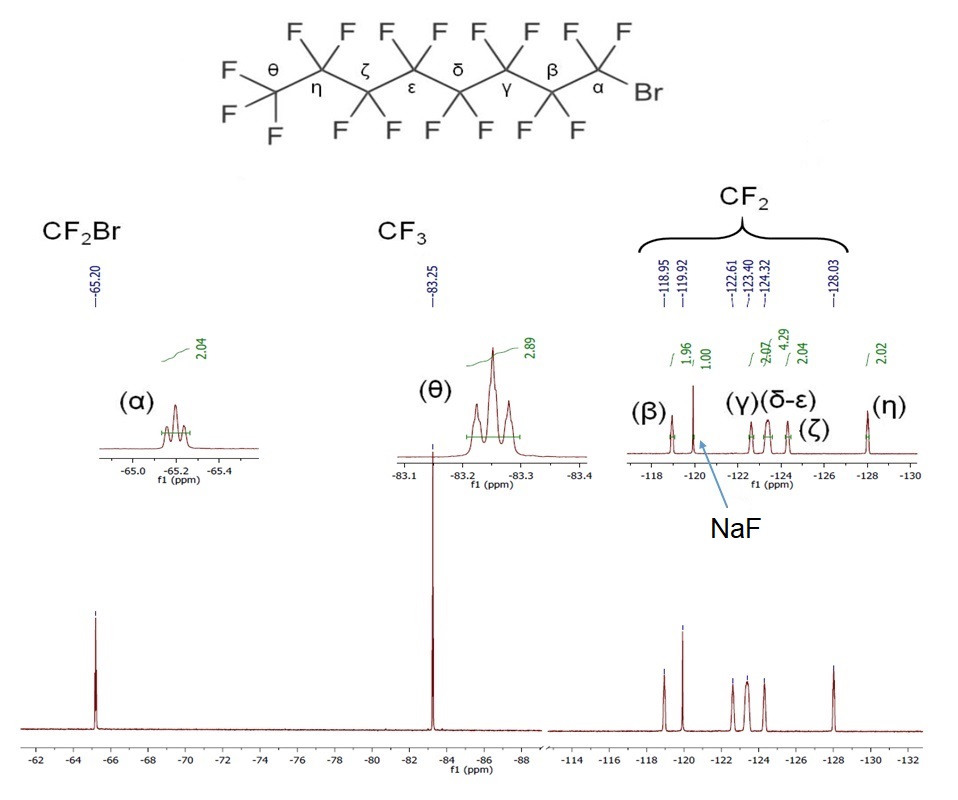
**

**Figure S2.** HyFC10-PFOB nanocapsules in 20% D2O measured with a Bruker Advance III HD 400 MHz spectrometer with described PFOB fluorine atoms signals (NaF as a reference).

**Results**

**
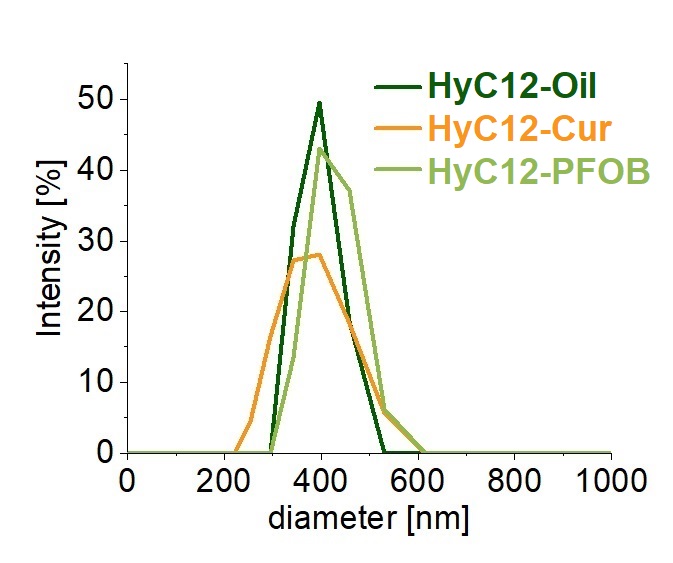
**

**Figure S3.** Intensity-weighted size distribution of nanocapsules based on HA derivatives with no cargo and loaded with curcumin of PFOB.

**
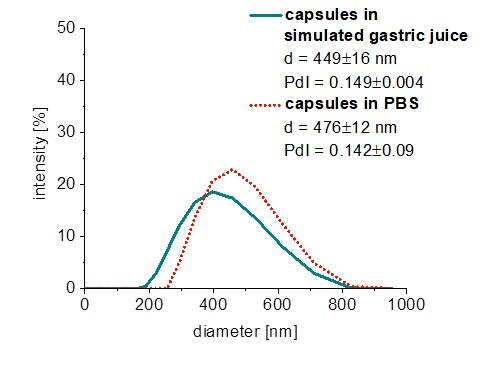
**

**Figure S4.** The comparison of the size of nanocapsules (HyC12-Cur) incubated in PBS and with simulated gastric juice for 2h.

**
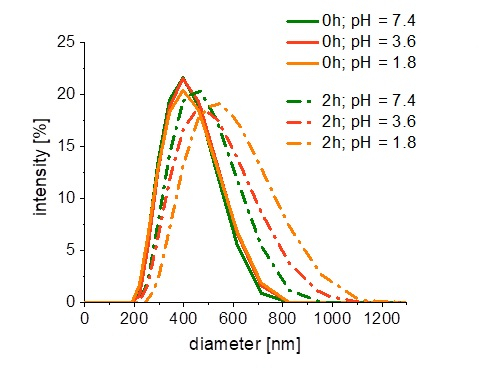
**

**Figure S5.** Size distributions of the HyC12-Cur nanocapsules in neutral and acidic pH conditions - freshly prepared samples (solid lines) and after 2h incubation (dotted lines).

**
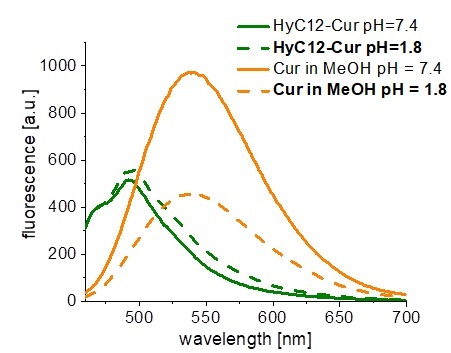
**

**Figure S6.** Fluorescence intensity (λex = 420 nm) of HyC12-Cur nanocapsules and curcumin in MeOH in neutral and acidic pH.

**
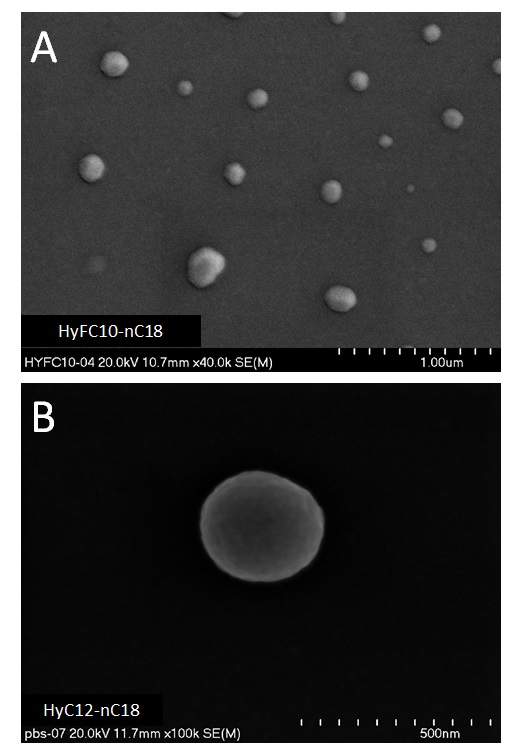
**

**Figure S7.** SEM images of the capsules stabilized by HyFC10 (A) and HyC12 (B) templated on n-octadecane (nC18) core.
